# Supplementary material for: Neutrophil Extracellular Traps Promote NLRP3 Inflammasome Activation and Glomerular Endothelial Dysfunction in Diabetic Kidney Disease
Source: MDPI journal article supplement (doi:10.3390/nu14142965), 2022-07-20
Supplement: s1 [file s1]

# Supplementary Materials

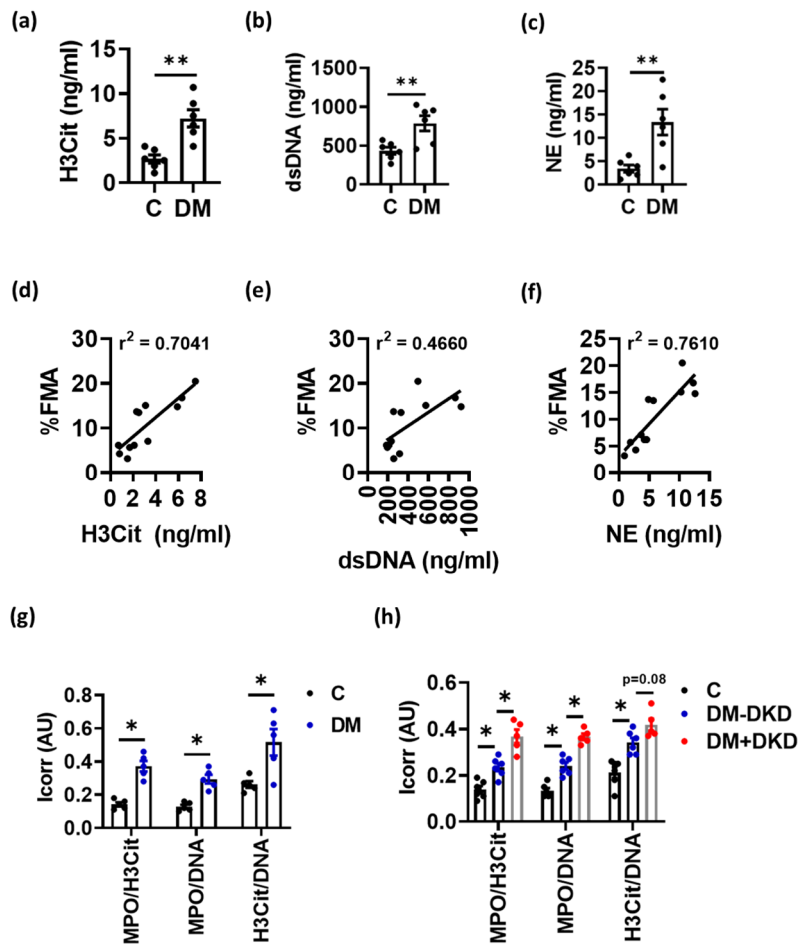

**Figure S1.** Increased NET formation in db/db mice. (a–c) Plasma levels of circulating H3Cit (a), dsDNA (b) and NE (c) measured in non-diabetic (C, db/m mice) and diabetic (DM, db/db model) mice, bar graphs with dot-plot, each dot represent one mouse;  $**P < 0.01$ , t-test. (d–f) Correlation (pearson's correlation) of fractional mesangial area (% FMA) obtained from PAS-stained glomeruli of control and DM mice with plasma NET markers H3Cit, dsDNA and NE. (g–h) Bar graphs with dot-plot (corresponding to the images in Figure. 1e and 1h.), each dot represent one mouse (g) or one patient (h) showing index of correlation (Icorr) between different markers (MPO, H3Cit and DNA) showing triple colocalization.

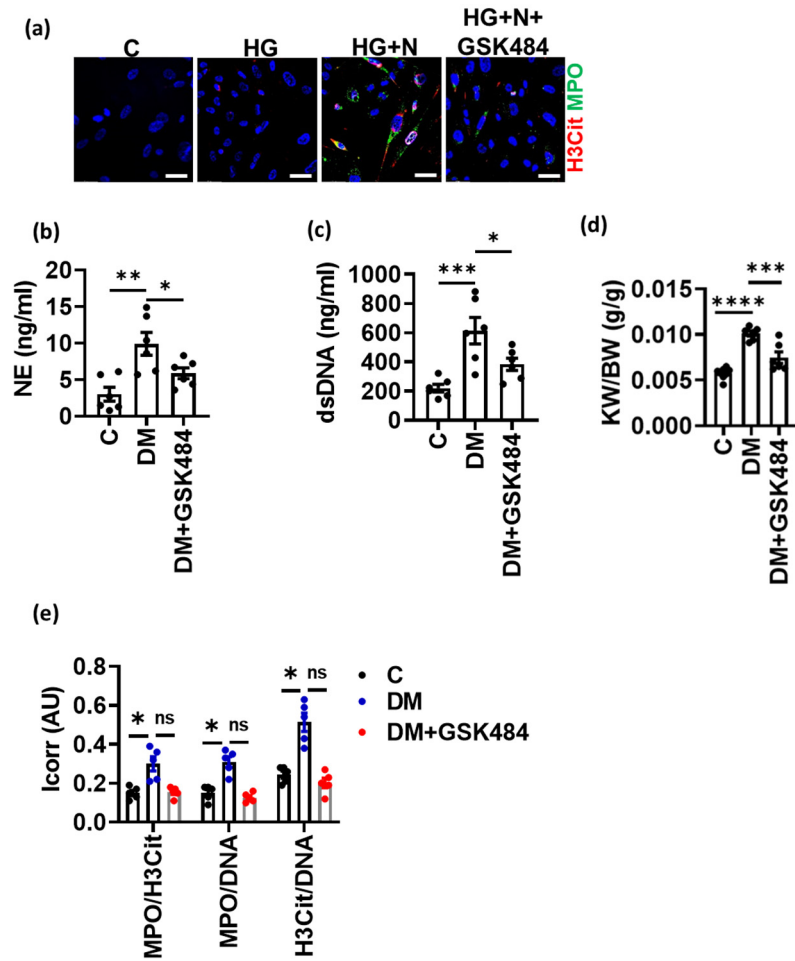

**Figure S2.** Effect of PAD4 inhibition in hGENCs. (a) Representative immunocytochemical images for NET markers MPO (green) and H3Cit (green) on hGENCs exposed to high glucose alone (HG, 25 mM), HG and neutrophils without (HG+N) or with the PAD4 inhibitor GSK484 (HG+N+GSK484) compared to control (C, 5 mM glucose, not neutrophils) hGENCs. (b–d) Bar graphs summarizing plasma levels of NE (b) and dsDNA (c) and kidney weight to body weight ratio in non-diabetic control (C) and diabetic mice without (DM) or with (DM+GSK484) treatment. (e) Bar graphs with dot-plot (corresponding to the images in Figure. 3e), each dot represent one mouse (g) or one patient (h) showing index of correlation (Icorr) between different markers (MPO, H3Cit and DNA) showing triple colocalization.  $N = \text{at least 5 mice each group}$ ; **b, c, d:** \* $p < 0.05$ , \*\* $p < 0.01$ , \*\*\* $p < 0.001$ , \*\*\*\* $p < 0.0001$ , ANOVA.

**Table S1.** (corresponding to Figure. 1h-j). Anthropometric, clinical and metabolic characteristics of renal biopsy control and diabetic patients with and without diabetic kidney disease. Data represents mean  $\pm$  SEM. Abbreviations: C: Control, DKD: Diabetic Kidney Disease, DM: Diabetes Mellitus, COPD: chronic obstructive pulmonary disease.

| <b>Characteristic</b>                 | <b>C<br/>(n = 6)</b> | <b>DM (-DKD)<br/>(n = 6)</b> | <b>DM (+DKD)<br/>(n = 5)</b> |
|---------------------------------------|----------------------|------------------------------|------------------------------|
| <b>Age (years)</b>                    | 71.5 $\pm$ 3.1       | 75.0 $\pm$ 3.2               | 78.2 $\pm$ 2.5               |
| <b>Sex (female/male)</b>              | (3/3)                | (3/3)                        | (2/3)                        |
| <b>History (N) of</b>                 |                      |                              |                              |
| Hypertension                          | 2                    | 4                            | 4                            |
| Brain tumor                           | 1                    | -                            | -                            |
| COPD                                  | 1                    | -                            | -                            |
| Steatosis hepatitis                   | 1                    | -                            | -                            |
| peripheral arterial occlusive disease | 1                    | -                            | -                            |
| Hypothyroidism                        | 1                    | -                            | -                            |
| Type 2 diabetes                       | -                    | 6                            | 5                            |
| <b>Diabetic complications (N)</b>     |                      |                              |                              |
| Diabetic neuropathy                   | -                    | 2                            | -                            |
| Diabetic kidney disease (DKD)         | -                    | -                            | 5                            |
| <b>Serum creatinine (mg/dl)</b>       | 1.1 $\pm$ 0.17       | 1.1 $\pm$ 0.06               | 1.9 $\pm$ 0.36               |
| <b>Serum urea (mg/dl)</b>             | 6.6 $\pm$ 0.66       | 6.8 $\pm$ 0.69               | 10.8 $\pm$ 1.78              |
